# Supplementary material
Source: publisher figshare collection journal article supplement (https://asha.figshare.com/ndownloader/files/23322515)
Supplement: Supplementary file 1 [file 23322515]

## Supplemental Material S1.

Speaker utterances, mean gender ratings, and media sources for the stimuli. Gender ratings were obtained from evaluators who rated the written utterances as to whether they thought the speaker was male or female using a 7-point Likert scale; 1 indicated “*Definitely a Male*,” 7 indicated “*Definitely a Female*,” and 4 indicated “*Neutral*.” All included stimuli received average ratings between 3 and 5, suggesting that raters did not perceive the utterances as strongly gendered.

| Speaker | Utterance                                                                                                                             | Mean Gender Rating | Media Source                      |
|---------|---------------------------------------------------------------------------------------------------------------------------------------|--------------------|-----------------------------------|
| 1       | And they have been since 2011, when Obama kind of laid down the law                                                                   | 3.67               | National Public Radio - Fresh Air |
|         | They would have had a completely different set of questions, right. Because they would have already known                             | 4.00               |                                   |
|         | They might not actually get a lot of the evidence because there's very rarely good evidence                                           | 4.17               |                                   |
|         | Yeah I have spoken to students that were in my book and the survivors are absolutely devastated                                       | 4.42               |                                   |
| 2       | I do love to travel, but I...I...For work I like just to be a little bit more grounded. That feels nice for me                        | 4.33               | Chewin' It                        |
|         | You always want kind of the...the party to continue and you always want, you know, to be asked back                                   | 4.33               |                                   |
|         | She then also was seeing certain things that were going down between her and I mean um her husband and Brandy                         | 4.58               |                                   |
|         | I remember being up in the gym like at the top of this...apart-, this condo complex that they put me up in, uh in Atlanta             | 3.00               |                                   |
| 3       | It's really important to not feel like you're crazy. To not feel you're alone and to talk about it. Because then...the more you know. | 4.67               | DENtalks                          |
|         | I wouldn't want her to feel pain, or remember pain, but...it's nothing she could have done because I wasn't talking about it          | 4.25               |                                   |
|         | I would just be this extreme fear that I didn't recognize it and understand, and made my mom take me to the pediatrician              | 4.17               |                                   |
|         | I can see now as an adult. I can...I see how his behaviors have affected that                                                         | 4.42               |                                   |
| 4       | And I didn't like how I was treated at my "go see's". I would try to crack jokes. They weren't really interested                      | 4.08               | National Public Radio - Fresh Air |
|         | I'll talk to the camera operators, the DP, like, and the director of course. This is kinda like...I'm gonna mark it for you           | 4.17               |                                   |
|         | So I tend to like, have a really good idea, or a really good sense of what I'm gonna do                                               | 4.17               |                                   |
|         | Additionally there was a body cast made, which was...thank god they had the foresight to do that                                      | 3.83               |                                   |

|           |                                                                                                                                                     |      |                                          |
|-----------|-----------------------------------------------------------------------------------------------------------------------------------------------------|------|------------------------------------------|
| <b>5</b>  | And they didn't necessarily agree with his theory which is, that he was doing the devil's music                                                     | 3.58 | <b>National Public Radio - Fresh Air</b> |
|           | You know it was wonderful music...upbeat most of the time, not all the time...but it was very um...emotional, though                                | 4.33 |                                          |
|           | It was frightening and...and sad...but when they did those songs like I'll Fly Away and stuff like that...it was absolutely wonderful               | 4.83 |                                          |
|           | But yes I...I do go to church occasionally, but, uh, I don't like below to a church..but..but I'm very spiritual                                    | 4.00 |                                          |
| <b>6</b>  | So I had put that into David's ear. Like in a really early lunch between us...one of the first times we'd ever talked, honestly                     | 4.83 | <b>National Public Radio - Fresh Air</b> |
|           | But you know I basically I...I met with them...and I really wanted to do it                                                                         | 4.17 |                                          |
|           | I knew I didn't quite have enough of a guarantee...that I could trust it                                                                            | 4.00 |                                          |
|           | And it's sold to you as what it really looks like. And I don't think that's what anyone was meaning to do on the show                               | 3.83 |                                          |
| <b>7</b>  | We were pursuing international adoption, and IVF simultaneously                                                                                     | 4.92 | <b>National Public Radio - Fresh Air</b> |
|           | A lot of people I knew were starting to fa...fall into that situation also                                                                          | 3.75 |                                          |
|           | Nothing was regular. Maybe they didn't have health insurance. Maybe they held on not unlike the characters in the movie                             | 4.17 |                                          |
|           | They held onto their...you know...New York existence by their fingernails because they had an unstabilized apartment                                | 4.00 |                                          |
| <b>8</b>  | Always people you know, see me a certain way and so it was fun, to just go completely against that                                                  | 4.25 | <b>Unqualified</b>                       |
|           | And so I was like a grownup, quote unquote, panicking on an airplane during turbulence with a baby blanket                                          | 4.33 |                                          |
|           | And, but I'm terrified of it, and now I've gotten to a point that I'm so scared where I'm gonna bring it on myself because that's all I think about | 4.58 |                                          |
|           | Because it was just the most outrageous show...and....Ryan Murphy just writes the craziest stuff                                                    | 3.92 |                                          |
| <b>9</b>  | Right, 'cause I'd been working since I was five years old....all the way up until I was 20                                                          | 3.25 | <b>Splash</b>                            |
|           | I learned how to have a dialogue with people that didn't agree with me                                                                              | 4.00 |                                          |
|           | But the great thing about kindness is that it's so simple to be kind to people                                                                      | 4.67 |                                          |
|           | Well even though we weren't raised in a Christian home my mom and dad always taught us the golden rule                                              | 4.08 |                                          |
| <b>10</b> | It's just a lotta juice goin' on on there. But, I feel like everybody is really just findin' out what they wanna do in life.                        | 3.33 | <b>Yes, Girl!</b>                        |
|           | I've just been picking up so many things from her. I can't really say now what I've just learned.                                                   | 4.58 |                                          |
|           | It was just. It..at first cause it was all about me, you know. I didn't get to film with my siblings and stuff                                      | 3.75 |                                          |

|           |                                                                                                                                                                    |      |                                          |
|-----------|--------------------------------------------------------------------------------------------------------------------------------------------------------------------|------|------------------------------------------|
|           | And, it was really so much fun making it. It's...a variety of sound.                                                                                               | 4.58 |                                          |
| <b>11</b> | If I didn't do that I wouldn't have done this. And then that and then that. And then it all just kinda keeps winding and it keeps going and it's weird and awesome | 3.75 | <b>7 Words</b>                           |
|           | Yeah, I think the dream really grew slowly for me. Umm, I was...I was really into art                                                                              | 4.08 |                                          |
|           | So I kinda had these two worlds that didn't really...they never really connected. They were always two separate things                                             | 4.33 |                                          |
|           | They helped us out in the beginning with that, and, um, you know, without all this stuff I don't...honestly don't know how we would do it                          | 4.08 |                                          |
| <b>12</b> | But uh basically it's a thriller that takes place over like, less than 48 hours in a hotel room                                                                    | 4.17 | <b>The Brett Davern Show</b>             |
|           | There was one fire fight at a place called Kop Keeding in northern Afghanistan. Uh, there were two guys that received the medal of honor there                     | 3.25 |                                          |
|           | Uh, but the best part was, like, none of the actors complained                                                                                                     | 4.00 |                                          |
|           | I forget what year it was. There's a great book called...I think it was called Red Platoon by, um, Clint Bromeshay who was one of the recipients                   | 3.42 |                                          |
| <b>13</b> | So we're not talking two, three unit buildings. We're talking about buildings with hundreds of units                                                               | 3.75 | <b>National Public Radio - Fresh Air</b> |
|           | Well in the eyes of the IRS, a cancelled dollar of debt is the same as a dollar of income                                                                          | 3.92 |                                          |
|           | So it's true that the IRS actually did perform some audits on some of the tax returns                                                                              | 3.92 |                                          |
|           | They're playing a much bigger game. And they might be more than happy to pay a couple million dollar more                                                          | 4.00 |                                          |
| <b>14</b> | Based on the intensity of the subject matter and my grandmother's salty language alone I knew this needed to be for an older audience                              | 4.50 | <b>National Public Radio - Fresh Air</b> |
|           | And my grandfather, he sat me down on the couch and he said it's time we tell you the truth about your mother                                                      | 3.83 |                                          |
|           | And, uh, she's in jail. That was 4th grade. Now she had been gone and in and out since I was two years old                                                         | 4.00 |                                          |
|           | You have this thing that you sort of hold back from people and then you put your best face forward                                                                 | 4.67 |                                          |
| <b>15</b> | So we grew up in one bedroom apartment in Manhattan. I'm really close with my family. Maybe too close                                                              | 4.25 | <b>National Public Radio - Fresh Air</b> |
|           | And I went to the bookstore in Brooklyn called Book Court which is...which is now closed, looking for another book of his                                          | 4.17 |                                          |
|           | Even the first paragraph remains probably one of my favorite in any book ever. So I was sort of immediately in just as a reader                                    | 4.50 |                                          |
|           | I just remember I moved to a new town when I was 14...You're home is sort of the edge of the world when you move somewhere new                                     | 4.67 |                                          |
| <b>16</b> | I'm a big fan of those shows. The TGIF ABC lineup was a big part of my childhood                                                                                   | 3.92 | <b>WTF</b>                               |

|    |                                                                                                                                                            |      |                                          |
|----|------------------------------------------------------------------------------------------------------------------------------------------------------------|------|------------------------------------------|
|    | And the...the first place I ever lived, uh, here in LA was like uh, a friend of a friend's house                                                           | 3.67 |                                          |
|    | And it was like this tiny closet of a bedroom in this gigantic, gorgeous house in the Hollywood hills                                                      | 4.75 |                                          |
|    | There were rumors amongst the other people living there that it was the third highest elevated house in all of Hollywood                                   | 4.08 |                                          |
| 17 | Every now and then you're surprised by one but most of the time it's just the same....a remake of the same thing you saw last year                         | 4.00 | <b>Happy Sad Confused</b>                |
|    | I...I respect that process but it's also just frustrating to see that there's not a lot of original film                                                   | 4.17 |                                          |
|    | I have a, um, little bit of an old school love for..for filmmaking and uh, the way it's presented                                                          | 3.42 |                                          |
|    | It's a shame that a lot of the films that end up in theaters are studio films                                                                              | 3.92 |                                          |
| 18 | And he wanted to demonstrate that even if nothing else came from it, it would just be that...that it was a person                                          | 4.17 | <b>National Public Radio - Fresh Air</b> |
|    | They really did believe they were not doing bad things to other people                                                                                     | 3.92 |                                          |
|    | Yeah, I was convinced, um, that there was a lot of latent support                                                                                          | 4.17 |                                          |
|    | And I ran, uh, training sessions on how people could hone their message to try to get that audience                                                        | 3.42 |                                          |
| 19 | And the game is actually a simulator sent back from the future to find humanity's savior to go through this crazy adventure through time                   | 3.50 | <b>Variety</b>                           |
|    | It's just, it's so different for me and it's so different than anything I've done before and I had so much fun making it                                   | 4.33 |                                          |
|    | The hours are brutal, the team was incredible, and it was really collaborative, and I had a really, really good time                                       | 4.42 |                                          |
|    | And he has this one game that he's trying to beat for years, and he finally beats it. The first person in the history of the world to beat this video game | 3.00 |                                          |
| 20 | I know a lot of people that come from that world do...um, but really this was just a good coincidence and it came at the perfect time                      | 4.25 | <b>On</b>                                |
|    | We're very inspired by more of the classic acts...like honestly Michael Jackson's a huge influence                                                         | 3.92 |                                          |
|    | But yeah the AP's been doing great. We got great reactions. Honestly I...I don't think we ever had better reactions with music release                     | 3.75 |                                          |
|    | So it's more about the coming of age of...it's more about, you know, what's...what's going on and how did he get to this point that we know him to be      | 3.83 |                                          |
| 21 | He's been a very good friend and I've maintained that friendship for years                                                                                 | 4.08 | <b>Gender Rebels</b>                     |
|    | She didn't really make waves, she just told me to find my buddies as soon as possible and get back to the ship                                             | 3.08 |                                          |
|    | So what happened was at the moment of truth, I got called out to go call my dad and let him know I'd gotten there safely                                   | 3.92 |                                          |
|    | And...I learned a whole lot of valuable skills which helped me get jobs that, uh, still help me get jobs                                                   | 4.42 |                                          |

|           |                                                                                                                                                                         |      |                                   |
|-----------|-------------------------------------------------------------------------------------------------------------------------------------------------------------------------|------|-----------------------------------|
| <b>22</b> | So the thing is more light is gonna get you better pictures. Anyone who's ever taken a photo at night knows this                                                        | 4.50 | <b>Gender Rebels</b>              |
|           | They're hiring you not because of your status, at least in theory. They should be hiring you not because of your status but because of your qualifications              | 4.50 |                                   |
|           | You might wanna like, you know, clean that up. Find a good open space to take photos                                                                                    | 4.42 |                                   |
|           | One upon a time I went and got a bunch of, like, dollar yard black fabric                                                                                               | 4.50 |                                   |
| <b>23</b> | And one of the things that I made sure to do, is to reach out to the pool staff and the department of parks of recreation                                               | 4.00 | <b>Trans Specific Partnership</b> |
|           | And we organized for a couple of years in a row and it's still going on. I'm sad to miss it this summer                                                                 | 4.58 |                                   |
|           | But for the most part it was just a bunch of folks hanging out by the pool which was so much fun                                                                        | 4.50 |                                   |
|           | And that's a powerful idea, and it's not something that is wholly new.                                                                                                  | 4.25 |                                   |
| <b>24</b> | There's things you just don't ask on a date. It's like, mmm, it wasn't important to you to go on the date so it shouldn't be important to you on the date.              | 4.83 | <b>LGBTQ&amp;A</b>                |
|           | I'm...I'm not gonna...no...cause you're already my last. No..I'm not doing freshman. You need to like be kind of experienced                                            | 4.42 |                                   |
|           | Cause it's the elephant in the room that no one ever wants to talk about. I'll...I'll bring it up first. I don't care. Just because I don't wanna talk about it either. | 4.25 |                                   |
|           | I make fun of myself a lot. Like if you can't make fun of yourself you should not be a stand-up comic                                                                   | 3.75 |                                   |
| <b>25</b> | But, you know, doctors are based off data. Science is data. Ya know, and we can't just present something that hasn't been verified from scientific process              | 4.17 | <b>LGBTQ&amp;A</b>                |
|           | And the other one is adherence. So we're like trying to find...find out if I send you a text message, do you take your medication on time?                              | 4.25 |                                   |
|           | But unfortunately, we haven't made it a mandatory process for all these ya know, health providers                                                                       | 3.83 |                                   |
|           | Now all the doctors in my organization will tell me that we don't have enough evidence to prove that, you know, there is no interaction                                 | 4.08 |                                   |
| <b>26</b> | The Amish boys always went to the electronics section while the women did the shopping for, you know, the basic necessities.                                            | 4.50 | <b>LGBTQ&amp;A</b>                |
|           | You know, it's really hard to measure, and I really...I dunno I don't like the...the competitive nature of, like, firsts                                                | 4.42 |                                   |
|           | I mean, the fact that it took so long to happen, I dunno if that's a win, but, um, I'm glad it's happening finally                                                      | 4.25 |                                   |
|           | There was this barrier between, um, Amish people and my family, which were evangelical ex-Mennonite                                                                     | 4.17 |                                   |
| <b>27</b> | Because you can trust me to have more interesting things to go on, rather than like dragging stuff out for, you know, for tension                                       | 3.92 | <b>Imogen Watches</b>             |

|           |                                                                                                                                                                           |      |                                                |
|-----------|---------------------------------------------------------------------------------------------------------------------------------------------------------------------------|------|------------------------------------------------|
|           | You can't see it, see it. It's not like you could hunt down the heart of the mall                                                                                         | 4.42 |                                                |
|           | What horror movies do is they take the things that are really scary, and then they let you play with them in a way that then you kinda feel safe                          | 4.17 |                                                |
|           | You know the first two movies seem pretty tenuously linked to each other                                                                                                  | 4.17 |                                                |
| <b>28</b> | About once or twice a year he does like, a tour where he does NBC news from various places around the country                                                             | 3.83 | <b>TransAdvocate</b>                           |
|           | That's where I really have a problem. I mean, if he'd come in and said, you know, I drank too much when I was young.                                                      | 4.25 |                                                |
|           | The law was pretty clear in their mind. The precedence was pretty clear and that's the way they ruled. So we can always hope that some of the judges will be judges       | 4.00 |                                                |
|           | But what that really means is we need to actually push harder. We need to work harder on getting the things that we want through.                                         | 4.50 |                                                |
| <b>29</b> | And then the commentator kind of like, pressed Abbot about it and Abbot's like, look...                                                                                   | 4.25 | <b>TransAdvocate</b>                           |
|           | Neat things are happening, but I, you know...I...I wanna talk about keeping your perspective                                                                              | 4.33 |                                                |
|           | You know, if...if...some of those good...uh...rulings get taken up to the supreme court then we're facing that                                                            | 3.75 |                                                |
|           | Starting, uh, some sort of legislation act, you know, motivated by hate is kinda stupid                                                                                   | 3.67 |                                                |
| <b>30</b> | And, when the policy does change, time will tell what it's gonna look like and how that will affect my career                                                             | 3.83 | <b>National Public Radio - Morning Edition</b> |
|           | But it wasn't until much more recently that I understood what it was                                                                                                      | 4.00 |                                                |
|           | Because you stand at the door and you have to make that first step, but once you've made it you can't go back in                                                          | 4.33 |                                                |
|           | And they find it to be a medical discharge and an administrative discharge at the same time. It's a little bit complicated.                                               | 3.83 |                                                |
| <b>31</b> | I was 20 years old and thus I had already established myself on this small campus                                                                                         | 4.33 | <b>Binder Life</b>                             |
|           | In my general physics lecture I felt like I could change the world, if I kept doing this, you know?                                                                       | 4.00 |                                                |
|           | So then, like, what do I do with all this energy that I have? And all this knowledge that I have, and all these tactics that I have?                                      | 3.75 |                                                |
|           | This is the kinda stuff that I think about when I'm sitting in lecture or in a lab, or something. Like I need to let other people speak                                   | 4.33 |                                                |
| <b>32</b> | So we were raised in, um, Lancaster, California, which is not too far from here                                                                                           | 4.00 | <b>LGBTQ&amp;A</b>                             |
|           | But back then it was like super hick. Like...like extra like...like Bakersfield, uh, maybe five, ten years ago                                                            | 4.67 |                                                |
|           | This whole story, I'll give you in a nutshell, is that my father is, uh, um, a primary care physician                                                                     | 4.00 |                                                |
|           | It was fun for me growing up, because it was all the kids my age and ...and we all got to play right afterward. It was like an hour of singing and then we got to do that | 4.25 |                                                |

|    |                                                                                                                                                         |      |                                               |
|----|---------------------------------------------------------------------------------------------------------------------------------------------------------|------|-----------------------------------------------|
| 33 | I have many theories about this. Um, and they are theories because how can we know? It's all just happened.                                             | 3.75 | LGTBQ&A                                       |
|    | You know that's what really happened. As someone who's been acting, I started my professional acting career in 2002.                                    | 4.00 |                                               |
|    | And they weren't famous and it's true Hollywood does work that way. We can't compare today to 20 years ago.                                             | 4.00 |                                               |
|    | And we've got to move past that. We're all in it together. We've just got to take steps together.                                                       | 4.17 |                                               |
| 34 | What I'm doing is what I should be doing. And that I think everybody's just looking for a...a little note from the universe saying, yeah that's good.   | 4.42 | National Public Radio - All Things Considered |
|    | Usually now, I...I started training at 20...21 years of age so I was fairly full grown at that time.                                                    | 4.08 |                                               |
|    | I still felt like a child when I was the gym. I didn't know my way around. I felt very intimidated                                                      | 4.33 |                                               |
|    | I'm so happy and thrilled and it really helped me to find where I am in life.                                                                           | 4.67 |                                               |
| 35 | I might be something that depending on your age, and depending on your relationship with your parents. You may consider asking.                         | 4.50 | Trans SWAG                                    |
|    | If you didn't hear episodes 1 and 2, in those shows I tell my story. I tell you a little bit about who I am                                             | 3.92 |                                               |
|    | And so when I think of death or somebody being dead, I feel as if they're no longer alive.                                                              | 4.00 |                                               |
|    | Five months ago...six months ago...seven months...whatever it was like I was like, Yo...                                                                | 3.33 |                                               |
| 36 | And just, I guess like a month ago is when I start upping it, and now I'm at, like, 580                                                                 | 3.67 | Trans SWAG                                    |
|    | Um, and then now I feel like I've just been behind. Like the entire time.                                                                               | 4.33 |                                               |
|    | And, you know like, she came in the room and was like, all right, let's do this!                                                                        | 4.83 |                                               |
|    | Ya know, and she's like don't worry about it. Like, we're gonna get this done and you're never gonna do this ever again.                                | 4.92 |                                               |
| 37 | And, um, I actually got to in real time lobby, um, one of the resolutions being passed                                                                  | 3.75 | Transadvocate                                 |
|    | I was fortunate enough to be elected as a delegate for my precinct, and, uh, so after I lost my race, um, I decided that I needed to have a backup plan | 3.83 |                                               |
|    | And that backup plan consisted of, um, I...I saw a lot of gaps that there were in Brazoria county                                                       | 3.67 |                                               |
|    | When you go to the convention, there's temporary committees that meet before the convention starts. They decide the rules                               | 4.08 |                                               |
| 38 | So, for him to write this, he wanted to do it completely where I wasn't involved in it                                                                  | 4.42 | National Public Radio - All Things Considered |
|    | I was happy to spend time with my dad. Like any little kid, you know, I looked at him as like my Superman                                               | 4.08 |                                               |
|    | You know he was always gonna be that person that...uh...that would be there for me even at my                                                           | 4.58 |                                               |

|           |                                                                                                                                                                                                                |      |                              |
|-----------|----------------------------------------------------------------------------------------------------------------------------------------------------------------------------------------------------------------|------|------------------------------|
|           | roughest times                                                                                                                                                                                                 |      |                              |
|           | Well we haven't officially met yet so that's gonna happen right, uh, after he gets back in town                                                                                                                | 4.33 |                              |
| <b>39</b> | She had her t-shirt on, and said, you never seen a motorcycle parked outside a psychiatrist's office? She had her combat boots on. So yeah...she was...she was good.                                           | 3.58 | <b>National Public Radio</b> |
|           | Blue was six foot tall, and weighted about 230 pounds. Had red hair and brown eyes.                                                                                                                            | 3.42 |                              |
|           | If I'd get to drinking and I'd get a little redneck and I'd get in somebody's face, Miss Blue would step in. And I'd be like, really, I don't need you to take up for me.                                      | 3.50 |                              |
|           | And I though, is that why she's fighting so hard? And so I whispered in her ear, you're really not leaving me. I know that.                                                                                    | 3.25 |                              |
| <b>40</b> | I was very ill. I had a kidney infection I didn't know. Um, and I had such a high fever that my skin was hurting                                                                                               | 4.25 | <b>You're So Brave</b>       |
|           | But, um, my mom was very involved with me and my brother. Like she was very close with us. She was very caring                                                                                                 | 4.67 |                              |
|           | We have lunch, right, and all the kids have their lunch boxes, and then there would be one person assigned every day to...to take the lunch boxes and bring them back upstairs to, like, where the lockers are | 4.50 |                              |
|           | So I was the person that day, and when I went...was going upstairs, there was this girl who's in my class who's a really, really, at the time we would call it hyperactive....                                 | 4.58 |                              |
